# Supplementary material
Source: publisher figshare collection journal article supplement (https://acs.figshare.com/ndownloader/files/17662589)
Supplement: Supplementary file 1 [file 17662589]

## Sheet: Table S1
Supporting information Table S1. Absolute and relative abundance of glycan isomers and their putative structures derived from six cell lines (N = three biological triplicates). The number of isomers follows the elution order.
Nomenclature of glycans: 4 digit code is used; the 1st number denotes the number of Hexosamine; the 2nd number denotes the number of Hexose; the 3rd number denotes the number of Fucose; the 4th number denotes the number of Sialic acid. For instance, 4512 represents glycan HexNAc4Hex5DeoxyHex1NeuAc2.
Symbols: , N-acetylglucosamine (GlcNAc); , Galactose (Gal); , Fucose (Fuc); , Mannose (Man); , N-acetylneuraminic acid (NeuAc/Sialic Acid); , α2,3-linked sialic acid; , α2,6-linked sialic acid.
GLYCANS		ISOMER	231BR_01	231BR_02	231BR_03	231_01	231_02	231_03	CRL_01	CRL_02	CRL_03	361_01	361_02	361_03	HTB131_01	HTB131_02	HTB131_03	HTB22_01	HTB22_02	HTB22_03	re_231BR_01	re_231BR_02	re_231BR_03	re_231_01	re_231_02	re_231_03	re_CRL_01	re_CRL_02	re_CRL_03	re_361_01	re_361_02	re_361_03	re_HTB131_01	re_HTB131_02	re_HTB131_03	re_HTB22_01	re_HTB22_02	re_HTB22_03
4502		1	213780646	164264543	111762973	196230882	321627212	82061266	36832685	25805022	22663223	3892986	6669635	6503394	0	0	0	2024437	2672962	5849918	0.443305	0.547797	0.531648	0.890904	0.771518	0.716574	0.187507	0.208979	0.200502	0.682016	0.763768	0.581797	0	0	0	1	1	1
		2	236963370	119606993	89000268	15809157	84176474	30574389	120312552	76349061	72778963	1815068	2062902	4674724	3855739	1657960	5854821	0	0	0	0.491378	0.398871	0.423368	0.0717748	0.201922	0.266981	0.612483	0.618303	0.643877	0.317984	0.236232	0.418203	1	1	1	0	0	0
		3	5888224	2618987	2361455	2653647	2631516	299033	7528333	4262762	3246271	0	0	0	0	0	0	0	0	0	0.0122101	0.00873392	0.0112333	0.0120478	0.00631247	0.00261121	0.038325	0.0345214	0.0287198	0	0	0	0	0	0	0	0	0
		4	25610773	13373226	7095015	5566783	8440877	1584250	31760512	17064705	14343942	0	0	0	0	0	0	0	0	0	0.0531076	0.0445977	0.0337505	0.0252736	0.0202479	0.013834	0.161685	0.138196	0.126901	0	0	0	0	0	0	0	0	0
4512		1core	732181232	505397978	302352988	534995998	612038640	168497909	28340420	16444540	19379356	66627343	65735924	125172394	3298117	1491331	3731742	3171617	1476498	5465643	0.516409	0.647393	0.762203	0.811941	0.798713	0.819008	0.482159	0.378918	0.407224	0.841054	0.839589	0.838112	0.357745	0.336899	0.331973	0.510546	0.355063	0.552553
		2core	669837022	269950745	89932143	114235084	147664920	35836678	26487523	23954681	25313502	11734836	11560738	21936584	4546263	2578752	5972067	3040586	2681908	4425974	0.472437	0.345796	0.22671	0.17337	0.192703	0.174189	0.450635	0.551967	0.53192	0.148132	0.147655	0.14688	0.49313	0.582553	0.53127	0.489454	0.644937	0.447447
		3core	6899762	1856002	1838033	8495673	5384285	1028297	2004912	1706377	1729835	763025	914444	2097747	1374814	356553	1537296	0	0	0	0.00486641	0.00237746	0.00463351	0.0128935	0.00702652	0.00499818	0.0341098	0.0393186	0.0363495	0.00963186	0.0116794	0.0140458	0.149125	0.0805472	0.136757	0	0	0
		4core	8915178	3461128	2559774	1183401	1192881	371289	1945367	1293132	1166229	93664	84289	143774	0	0	0	0	0	0	0.00628789	0.00443356	0.00645295	0.001796	0.00155672	0.0018047	0.0330967	0.0297965	0.0245063	0.00118234	0.00107655	0.000962662	0	0	0	0	0	0
5603		1	40735918	25697579	16850948	38700362	90534455	10978043	23735744	15016372	15258398	0	0	0	0	0	0	0	0	0	0.363057	0.465987	0.595779	0.754541	0.804656	0.771052	0.537281	0.539961	0.503146	0	0	0	0	0	0	0	0	0
		2	10486689	13847362	6884579	0	0	0	3659734	1396350	2122099	0	0	0	0	0	0	0	0	0	0.0934621	0.251101	0.24341	0	0	0	0.0828416	0.0502102	0.0699762	0	0	0	0	0	0	0	0	0
		3	55672870	13863905	4220100	12589583	21978772	3259703	16602270	11275234	12870906	0	0	0	0	0	0	4759923	1724118	3763428	0.496182	0.251401	0.149205	0.245459	0.195344	0.228948	0.375808	0.405437	0.424418	0	0	0	0	0	0	1	1	1
		4	5307080	1737763	328269	0	0	0	179750	122134	74594	0	0	0	0	0	0	0	0	0	0.0472991	0.0315117	0.0116062	0	0	0	0.00406881	0.00439172	0.00245974	0	0	0	0	0	0	0	0	0
5613		1core	14183800	5031525	5654704	7353493	8099630	4522377	0	0	0	832414	952447	906371	0	0	0	0	0	0	0.634977	0.431423	0.53145	0.718712	0.726393	0.759916	0	0	0	0.744975	0.83252	0.706371	0	0	0	0	0	0
		2core	3145197	2414600	2422773	575565	1202574	361914	7030338	443047	260438	36816	41386	46331	0	0	0	0	0	0	0.140803	0.207038	0.227701	0.0562543	0.10785	0.0608141	0.870407	0.364208	0.318251	0.0329488	0.0361749	0.0361076	0	0	0	0	0	0
		3core	2535258	2448249	1489454	2302431	1848277	1066863	241624	187131	125574	248141	150220	330436	0	0	0	0	0	0	0.113498	0.209923	0.139984	0.225034	0.165758	0.17927	0.0299148	0.153832	0.153449	0.222076	0.131305	0.257522	0	0	0	0	0	0
		4core	2473245	1768240	1073216	0	0	0	805107	586288	432329	0	0	0	0	0	0	0	0	0	0.110722	0.151616	0.100865	0	0	0	0.0996781	0.48196	0.528299	0	0	0	0	0	0	0	0	0
2700		1	188584892	160026573	111711318	25118237	44149130	5662387	49404519	23666405	25723669	0	0	0	0	0	0	0	0	0	0.028553	0.0323557	0.0324238	0.00765103	0.0129938	0.00358964	0.010002	0.00594557	0.00716658	0	0	0	0	0	0	0	0	0
		2	3086669731	2119568218	1759757048	1857556334	1785763647	960820925	2872883756	2278688041	2109776319	595488384	872390208	1478954293	1782717542	1479852754	2238426368	1320060692	1078992609	1689759056	0.467342	0.428555	0.510763	0.565813	0.525578	0.609107	0.58162	0.572461	0.587781	0.609626	0.595931	0.595993	0.634391	0.714022	0.658348	0.627884	0.661273	0.662621
		3	3329477288	2666258089	1573880481	1400312332	1567800809	610941886	2017163948	1678154950	1453892350	381321444	591521262	1002541253	1027404826	592706126	1161638069	782336204	552696843	860354691	0.504105	0.53909	0.456813	0.426536	0.461428	0.387303	0.408378	0.421593	0.405053	0.390374	0.404069	0.404007	0.365609	0.285978	0.341652	0.372116	0.338727	0.337379
2300		1	258472773	279266368	145803468	113282969	140647852	47626640	1240390855	907596235	972915850	366277743	338281215	972915830	320294939	116317921	268952423	114989451	70862850	172023143	0.108036	0.138846	0.12668	0.0713359	0.0611574	0.0695012	0.187629	0.166764	0.176346	0.272145	0.294927	0.176346	0.161137	0.145903	0.158772	0.0858432	0.0735486	0.124216
		2	1540609107	1227625436	738789975	1373068177	1678751088	619663297	5370469445	4534810599	4544171340	979616317	808718123	4544171340	1585229389	654292488	1375156591	1221464151	885298529	1207100923	0.643942	0.610353	0.64189	0.864641	0.729966	0.90427	0.812371	0.833236	0.823654	0.727855	0.705073	0.823654	0.797515	0.820709	0.811801	0.911861	0.918851	0.871637
		3	593382585	504444401	266367387	101669789	480368533	17973489	0	0	0	0	0	0	82187652	26617992	49848735	3075607	7322564	5742979	0.248021	0.250801	0.23143	0.064023	0.208877	0.0262286	0	0	0	0	0	0	0.0413479	0.0333882	0.0294274	0.00229604	0.00760009	0.00414695
3300		1	457762460	156825165	55936453	96224313	108035503	0	78210615	56346225	78489481	0	0	0	88457037	28265699	79548958	0	0	0	0.286227	0.132089	0.125395	0.534899	0.158449	0	0.484225	0.489538	0.547913	0	0	0	0.755354	0.881263	0.845731	0	0	0
		2	990807337	918791132	353972215	42303810	481440153	32654083	10639553	2886101	4069722	0	0	0	28649617	3808388	14510472	0	0	0	0.619526	0.773868	0.793515	0.235162	0.7061	0.786711	0.0658726	0.0250745	0.0284096	0	0	0	0.244646	0.118737	0.154269	0	0	0
		3	150730173	111654502	36172564	41364205	92354268	8853009	72667033	55868545	60692513	0	0	0	0	0	0	0	0	0	0.0942476	0.094043	0.0810896	0.229939	0.135451	0.213289	0.449903	0.485388	0.423677	0	0	0	0	0	0	0	0	0
3310		1core	1166545597	973367270	498725256	1333164485	1044619921	550828794	169460967	129980008	173285393	98168065	74827851	143411874	693124977	419430551	657322682	255522994	178073093	280708939	0.357444	0.444061	0.454079	0.59899	0.397916	0.573336	0.433023	0.396296	0.45359	0.454977	0.458428	0.468752	0.728293	0.804675	0.74327	0.535093	0.537332	0.565244
		2core	2097026818	1218598425	599596801	892523627	1580604955	409914765	221883287	198007006	208745543	117596954	88399306	162531886	258586692	101811869	227042787	222007265	153329393	215906861	0.642556	0.555939	0.545921	0.40101	0.602084	0.426664	0.566977	0.603704	0.54641	0.545023	0.541572	0.531248	0.271707	0.195325	0.25673	0.464907	0.462668	0.434756
4310		1core	4684276014	3527956682	1673748769	4218988006	8803272617	1320818599	270866051	208997983	270955401	191365716	156266292	295480790	1176908083	524280903	1013808715	494639651	424001483	489556708	0.988202	0.990554	0.988808	0.99625	0.996288	0.993066	0.574236	0.589314	0.614702	0.990376	0.995528	0.995056	0.993005	0.994957	0.993183	0.980525	0.991659	0.973163
		2core	55924288	33641355	18945242	15880560	32799014	9222308	200832202	145648245	169836136	1859576	702010	1467991	8290336	2657360	6958848	9824535	3566493	13500584	0.0117979	0.00944558	0.0111924	0.00374995	0.00371195	0.00693385	0.425764	0.410686	0.385298	0.00962387	0.0044723	0.00494358	0.00699489	0.00504302	0.00681727	0.0194752	0.00834135	0.0268371
5310		1core	336190825	275660039	108058522	99939183	210400906	22485092	38371117	27295668	27289616	0	0	0	62050074	20224173	46433952	65570407	51590453	61913765	0.316887	0.446202	0.604886	0.381816	0.291535	0.466268	0.564593	0.496581	0.418802	0	0	0	0.515591	0.514286	0.544459	0.662615	0.613696	0.613482
		2core	724725746	342131459	70584307	161807677	511299109	25738430	29591325	27671588	37871589	21423422	13891639	29793757	58297416	19100563	38850555	33386616	32474765	39008082	0.683113	0.553798	0.395114	0.618184	0.708465	0.533732	0.435407	0.503419	0.581198	1	1	1	0.484409	0.485714	0.455541	0.337385	0.386304	0.386518
4510		1branch	51374773	38894048	26632928	69962539	102873711	18604556	27474460	18262479	11850328	7849801	3647545	11850328	0	0	0	0	0	0	0.0889868	0.0975416	0.114216	0.125153	0.1481	0.0745313	0.0818765	0.0653422	0.0374472	0.0868407	0.0424988	0.0374472	0	0	0	0	0	0
		2branch	68361820	45504553	21187468	11232697	17940716	9087947	42712270	31573593	35027550	3288813	5970837	35027550	8807819	3432087	9034507	25511436	14645316	26093645	0.11841	0.11412	0.0908627	0.0200936	0.025828	0.036407	0.127287	0.112969	0.110687	0.0363835	0.0695682	0.110687	0.119167	0.0884301	0.117094	0.126385	0.083932	0.115999
		3core	455165787	312871240	184420633	477369016	572845231	221229833	263091114	228156752	267762504	78213218	75253219	267762504	64617172	35022123	67118830	174315418	153560064	194604085	0.788398	0.784643	0.79089	0.853942	0.824685	0.886264	0.784037	0.816333	0.846133	0.865257	0.876801	0.846133	0.874252	0.902369	0.869912	0.863568	0.88005	0.865112
		4core	1528509	1004259	517702	270553	619482	598506	1643674	1027526	1409807	950771	715718	1409807	220499	221785	713486	796996	3056028	2510631	0.00264755	0.00251856	0.00222017	0.000483979	0.000891824	0.00239766	0.00489831	0.00367644	0.00445501	0.0105182	0.00833907	0.00445501	0.00298329	0.00571444	0.00924733	0.00394836	0.017514	0.011161
		5core	899116	469246	422527	183119	344271	99744	638183	469412	404368	90481	239739	404386	265917	135314	289068	1230924	3228802	1738280	0.00155737	0.00117681	0.00181201	0.000327573	0.000495623	0.000399582	0.00190185	0.00167953	0.00127781	0.00100097	0.00279328	0.00127786	0.00359778	0.00348646	0.00374654	0.00609807	0.0185042	0.00772752
3410		1core	80628306	72999550	45597270	43013410	25013571	22681118	1962018	1145671	6180546	0	0	0	23904247	10773844	25212893	11369875	7585121	12020034	0.151025	0.203197	0.221692	0.187722	0.0845862	0.189897	0.00862806	0.00589426	0.0273704	0	0	0	0.219588	0.194779	0.2339	0.0521857	0.0389988	0.0507531
		2core	71442856	54871038	28515504	41310604	58913458	17356201	52153011	39477689	54388401	0	0	0	22749879	9830867	22163100	17210572	19776294	24797129	0.13382	0.152735	0.138641	0.18029	0.199222	0.145315	0.229345	0.203105	0.240857	0	0	0	0.208984	0.177731	0.205607	0.0789934	0.101679	0.104703
		3core	381802420	231385266	131565666	144810026	211789931	79401490	173284769	153747350	165242632	76513879	77681871	148819676	62205544	34708562	60417373	189293082	167135054	200016541	0.715155	0.644068	0.639667	0.631988	0.716191	0.664788	0.762027	0.791001	0.731772	1	1	1	0.571429	0.627491	0.560492	0.868821	0.859322	0.844544
4410		1core	243065612	160993810	75949716	118282255	190491600	50444030	10692151	5561380	5262272	22620952	16422527	37927220	31283773	10333477	27195679	4036668	33620582	45618958	0.385557	0.390601	0.379536	0.661653	0.517915	0.593049	0.055633	0.0386479	0.0329263	0.832201	0.712128	0.687856	0.602557	0.55811	0.637688	0.140555	0.646792	0.696711
		2core	387361119	251175700	124162338	60485679	177313313	34614793	56417743	46162393	52822369	4561115	6638686	17211117	20634628	8181644	15451637	24682873	18359937	19858592	0.614443	0.609399	0.620464	0.338347	0.482085	0.406951	0.293551	0.320798	0.330512	0.167799	0.287872	0.312144	0.397443	0.44189	0.362312	0.859445	0.353208	0.303289
		3core	0	0	0	0	0	0	30264251	27183609	33762703	0	0	0	0	0	0	0	0	0	0	0	0	0	0	0	0.15747	0.188908	0.211255	0	0	0	0	0	0	0	0	0
		4core	0	0	0	0	0	0	94816754	64991328	67972502	0	0	0	0	0	0	0	0	0	0	0	0	0	0	0	0.493347	0.451646	0.425307	0	0	0	0	0	0	0	0	0
2400		1	250619299	230327964	105744110	105926929	142209167	52888389	815633663	649280777	631205435	172951879	181191448	306255118	120772232	42944202	125465109	133124897	99846859	187026401	0.495213	0.506522	0.551803	0.381356	0.397664	0.369992	0.549548	0.545163	0.534645	0.382571	0.444734	0.41097	0.267748	0.275434	0.316453	0.364444	0.396616	0.429587
		2	255464380	224396733	85889568	171837094	215401811	90056240	668555739	541704972	549402158	279125707	226223776	438946356	330295295	112970610	271007616	232157167	151900035	248336716	0.504787	0.493478	0.448197	0.618644	0.602336	0.630008	0.450452	0.454837	0.465355	0.617429	0.555266	0.58903	0.732252	0.724566	0.683547	0.635556	0.603384	0.570413
2500		1	4950936661	2582720044	1931977041	3531182547	2109191529	2489404831	6358999501	4908616166	4606615403	3204985172	3805258773	6275345129	3114080888	2127012758	3744944442	3586122923	2857181812	3834821487
2600		1	16414109668	13126758551	6623208323	12209733916	8374703361	8941993056	20872957341	8936033913	8024073156	2387510447	3497592713	4995775263	6238441110	3815241366	6681603018	3181280146	2301333421	4136724498
2700		1	188584892	160026573	111711318	25118237	44149130	5662387	49404519	23666405	25723669	0	0	0	0	0	0	0	0	0	0.028553	0.0323557	0.0324238	0.00765103	0.0129938	0.00358964	0.010002	0.00594557	0.00716658	0	0	0	0	0	0	0	0	0
		2	3086669731	2119568218	1759757048	1857556334	1785763647	960820925	2872883756	2278688041	2109776319	595488384	872390208	1478954293	1782717542	1479852754	2238426368	1320060692	1078992609	1689759056	0.467342	0.428555	0.510763	0.565813	0.525578	0.609107	0.58162	0.572461	0.587781	0.609626	0.595931	0.595993	0.634391	0.714022	0.658348	0.627884	0.661273	0.662621
		3	3329477288	2666258089	1573880481	1400312332	1567800809	610941886	2017163948	1678154950	1453892350	381321444	591521262	1002541253	1027404826	592706126	1161638069	782336204	552696843	860354691	0.504105	0.53909	0.456813	0.426536	0.461428	0.387303	0.408378	0.421593	0.405053	0.390374	0.404069	0.404007	0.365609	0.285978	0.341652	0.372116	0.338727	0.337379
2800		1	7594137614	4523662157	2789550787	2082369404	1699225797	1038168510	4047911663	3313068387	2957726488	777461665	1230093400	1724005861	1903659452	1524225005	247922484	1514490360	1164085329	1985985047
2900		1	4131435250	2575098083	1736485420	785023412	937864379	336287196	1281250544	844968371	733573059	347137042	468322730	749884646	419519951	346245830	602259234	435385456	343789840	470100294
2310		1	3429359518	2696901889	1299785285	2246647973	2624418842	1015570639	2590034837	2371850526	2589224135	749418786	626997630	1121349271	1891579548	845901443	1599027248	2466162270	1976989904	2239762689
3601		1	163152552	122985961	76191467	134262571	141878505	53869983	76305315	43112362	40565719	24238708	37249425	56636097	7953268	1942696	1086738	0	0	0	1	1	1	0.637789	0.676377	0.665169	0.43266	0.375046	0.392081	0.662129	0.646693	0.582023	0.150518	0.068065	0.021231	0	0	0
		2	0	0	0	76249878	67884065	27116957	100057940	71839962	62896899	12368506	20350474	40672879	44886126	26599086	50099575	0	0	0	0	0	0	0.362211	0.323623	0.334831	0.56734	0.624954	0.607919	0.337871	0.353307	0.417977	0.849482	0.931935	0.978769	0	0	0
4511		1core	141813745	86342148	53787884	85453875	97306674	28106893	27654085	16133074	16425362	0	0	0	0	0	0	0	0	0	0.108721	0.105962	0.15195	0.120925	0.119035	0.116437	0.104915	0.0719079	0.0652474	0	0	0	0	0	0	0	0	0
		2core	544994511	444170400	219424088	465349520	509097214	163978688	105943541	73811828	86323011	68961732	68487367	130344953	8540438	4012542	12671284	16733554	14094478	18778919	0.417818	0.545099	0.61987	0.658513	0.622778	0.679304	0.401933	0.328992	0.342906	0.732534	0.745154	0.71252	0.0978774	0.0888999	0.127867	0.51562	0.540122	0.429773
		3core	617575700	284331053	80772225	155863395	211057584	49306459	129987138	134412618	148991490	25179544	23422964	52590262	78716063	41122979	86425909	15719727	12000507	24916073	0.473462	0.348939	0.22818	0.220561	0.258187	0.204259	0.493151	0.5991	0.591847	0.267466	0.254846	0.28748	0.902123	0.9111	0.872133	0.48438	0.459878	0.570227
4300		1	609751696	474323082	176129285	477327704	1127943920	85544240	195415150	148389041	147587606	0	0	0	166483893	76245105	134557515	0	0	0	0.663511	0.540025	0.44866	0.982236	0.907786	0.963162	0.485194	0.473126	0.487898	0	0	0	0.945756	1	1	0	0	0
		2	200116240	312338014	146150160	0	0	810219	0	0	0	0	0	0	0	0	0	0	0	0	0.21776	0.355602	0.372293	0	0	0.00912244	0	0	0	0	0	0	0	0	0	0	0	0
		3bisecting	109109120	91673981	70287687	8632794	114577444	2461571	207341457	165246343	154909231	0	0	0	9548646	0	0	0	0	0	0.118729	0.104372	0.179046	0.0177644	0.0922137	0.0277154	0.514806	0.526874	0.512102	0	0	0	0.0542436	0	0	0	0	0
4411		1	175998979	104750239	53333453	62792585	131790234	20668868	0	0	0	0	0	0	0	0	0	0	0	0	0.164355	0.162438	0.163681	0.224076	0.281443	0.244823	0	0	0	0	0	0	0	0	0	0	0	0
		2	428679491	275097745	169908662	128235204	184900706	39936621	0	0	0	18948632	23446295	55878165	22180395	7933688	26234024	0	0	0	0.400319	0.426599	0.521452	0.457609	0.394862	0.473049	0	0	0	0.619013	0.690353	0.69696	0.331667	0.267866	0.309443	0	0	0
		3	20273473	13278601	7901642	35221701	68737873	13578785	0	0	0	4090219	5883664	9942903	8247910	3353874	12564771	0	0	0	0.0189322	0.0205914	0.0242502	0.125689	0.146792	0.160841	0	0	0	0.133619	0.173239	0.124016	0.123332	0.113237	0.148207	0	0	0
		4	399657682	237906631	91095813	51641862	78580738	9995177	40103745	38566932	29220959	6644300	4227709	13449584	34340640	16606419	42517680	0	0	0	0.373217	0.368926	0.279574	0.184285	0.167812	0.118393	0.844036	0.862739	0.763922	0.217056	0.124481	0.167755	0.5135	0.560685	0.501516	0	0	0
		5bisecting	29043529	10610173	2319169	1869522	3272185	244358	6405173	5604668	8296417	535679	309458	763644	1461934	1424632	2544166	0	0	0	0.0271221	0.0164534	0.00711756	0.00667142	0.00698786	0.00289442	0.134805	0.125376	0.216893	0.0174995	0.00911169	0.00952482	0.0218605	0.0481001	0.0300096	0	0	0
		6bisecting	13974669	2480795	810847	467618	985202	0	731531	357704	109427	392227	95623	139824	104084	64719	214896	0	0	0	0.0130501	0.00384701	0.0024885	0.0016687	0.00210393	0	0.015396	0.00800181	0.00286074	0.0128132	0.00281553	0.001744	0.00155638	0.00218512	0.0025348	0	0	0
		7bisecting	3217362	738817	468286	0	0	0	273829	173602	624432	0	0	0	540610	234739	702751	0	0	0	0.00300451	0.0011457	0.00143717	0	0	0	0.00576309	0.00388346	0.0163245	0	0	0	0.00808382	0.00792553	0.00828928	0	0	0
4400		1	50178075	59981924	44149795	38268443	61414564	13121858	69244932	69035750	61670263	0	0	0	0	0	0	0	0	0	0.339277	0.47669	0.416993	0.536455	0.564084	0.581428	0.243053	0.300031	0.296021	0	0	0	0	0	0	0	0	0
		2	97719124	65848188	61726866	33067362	47460212	9446451	215651094	161059330	146660258	0	0	0	0	0	0	0	0	0	0.660723	0.52331	0.583007	0.463545	0.435916	0.418572	0.756947	0.699969	0.703979	0	0	0	0	0	0	0	0	0
3511		1core	146838623	74820463	42370803	49262644	43938892	22573349	6381799	3493408	1908878	8469220	8188044	19952751	0	0	0	0	0	0	0.790875	0.684997	0.695361	0.574166	0.666913	0.69772	0.409693	0.288545	0.231671	0.366843	0.345594	0.422496	0	0	0	0	0	0
		2core	38827335	34406926	18562743	36536006	21945077	9779688	9195234	8613579	6330734	14617534	15504593	27273192	31146437	16053530	39038897	14091894	11420989	21599262	0.209125	0.315003	0.304639	0.425834	0.333087	0.30228	0.590307	0.711455	0.768329	0.633157	0.654406	0.577504	1	1	1	1	1	1
4611		1core	66348745	51284839	39892875	37329929	55156534	17816456	6804181	3771780	3790716	0	0	0	0	0	0	0	0	0	0.292549	0.439193	0.425577	0.517619	0.596865	0.607967	0.0914145	0.0839359	0.0835807	0	0	0	0	0	0	0	0	0
		2core	145938731	56674203	47849456	31462936	32713087	11153886	46925631	32922372	32307398	0	0	0	0	0	0	0	0	0	0.643483	0.485347	0.510457	0.436267	0.353998	0.380614	0.630448	0.732643	0.712339	0	0	0	0	0	0	0	0	0
		3core	14507540	8811495	5996075	3325632	4540713	334644	20702373	8242283	9255836	0	0	0	0	0	0	0	0	0	0.0639676	0.0754599	0.063966	0.0461134	0.0491364	0.0114194	0.278137	0.183421	0.20408	0	0	0	0	0	0	0	0	0
4500		1	293668049	277198208	145978351	369736975	506240244	202962256	61801976	515233387	520125074	29831706	30971536	51716328	36794040	20006977	33037285	52428501	33378804	53675347
3610		1branch	17131773	14809094	12043940	25315787	23230581	5096675	1940828	6369410	4910782	9903047	15511496	16617453	19890992	8620364	6781463	0	0	0	0.0773477	0.0788242	0.0875555	0.136356	0.129753	0.0678726	0.0116787	0.0454776	0.0368903	0.187578	0.199783	0.153461	0.125351	0.0881921	0.0454597	0	0	0
		2branch	92497008	81079836	55792314	56206896	51126731	30040575	46336700	30365460	27356572	3350981	7974437	12005099	52557649	33805320	52706490	59467112	57228644	92920711	0.417612	0.431563	0.405592	0.302742	0.285565	0.400051	0.278826	0.216809	0.205505	0.0634726	0.102708	0.110866	0.331213	0.345851	0.353319	0.524987	0.611417	0.584097
		3branch	58148108	54513066	42538428	56723095	74799324	26561006	84302642	81770825	80979856	19276438	26611565	36470309	47953976	34217366	49648334	53806391	36371369	66163669	0.262531	0.290156	0.30924	0.305522	0.417787	0.353714	0.507282	0.583844	0.608329	0.365124	0.342748	0.3368	0.302201	0.350067	0.332819	0.475013	0.388583	0.415903
		4core	53713514	37472896	27183106	47413823	29880442	13393530	23966465	15121075	13953919	20263703	27544317	43191845	23996022	12774423	23958469	0	0	0	0.242509	0.199457	0.197612	0.25538	0.166895	0.178362	0.144215	0.107964	0.104823	0.383825	0.354761	0.398873	0.151221	0.130691	0.160606	0	0	0
		5core	0	0	0	0	0	0	7036514	4379938	4407076	0	0	0	14283581	8327814	16080614	0	0	0	0	0	0	0	0	0	0.0423414	0.0312727	0.0331064	0	0	0	0.0900137	0.0851991	0.107797	0	0	0
		6core	0	0	0	0	0	0	2601976	2049348	1510380	0	0	0	0	0	0	0	0	0	0	0	0	0	0	0	0.0156571	0.0146323	0.0113461	0	0	0	0	0	0	0	0	0
3600		1	12207892	17887843	14452900	21212206	20794605	4154039	0	0	0	0	0	0	10408631	4218013	9708379	0	0	0	0.0914498	0.140734	0.179836	0.0889936	0.10956	0.0406069	0	0	0	0	0	0	0.156771	0.104465	0.133615	0	0	0
		2	121284954	109215981	65914373	217144351	169007107	98144695	364134300	259711745	261854835	60619911	98600138	166934593	55985219	36159444	62951236	87529497	60714292	108463005	0.90855	0.859266	0.820164	0.911006	0.89044	0.959393	1	1	1	1	1	1	0.843229	0.895535	0.866385	1	1	1
3411		1branch	210423765	117202652	57522479	63521865	83357295	28361758	56520976	47286684	45224653	20227141	17261710	40138779	40458854	19932563	41219029	50778632	26660061	47109113	0.275859	0.226468	0.195779	0.235832	0.256287	0.288313	0.070771	0.0807426	0.0797103	0.239314	0.196353	0.229947	0.0774581	0.0832119	0.0851971	0.311295	0.233263	0.273724
		2branch	313199148	192412325	108990451	107685816	112465545	42409128	58908772	38334057	42354858	29600191	37489639	67321582	33468399	11551508	26794573	43011187	36096795	46825679	0.410595	0.371794	0.370952	0.399796	0.345783	0.431112	0.0737608	0.0654558	0.0746521	0.35021	0.426447	0.385671	0.0640749	0.0482237	0.0553826	0.263677	0.31583	0.272077
		3core	220151069	195851997	121736313	94528895	125239122	27502073	380976242	304311909	289441068	34693957	32904478	66705136	443171550	206054299	409492482	69330893	51535052	78169900	0.288611	0.37844	0.414333	0.350949	0.385056	0.279574	0.477028	0.519616	0.510151	0.410476	0.37429	0.38214	0.848447	0.860209	0.846394	0.425028	0.450907	0.4542
		4core	19020150	12057457	5563512	3615472	4187416	98435	302239719	195714934	190342482	0	255872	391318	5233630	2001577	6302052	0	0	0	0.0249348	0.0232983	0.0189356	0.0134228	0.0128745	0.00100065	0.37844	0.334186	0.335486	0	0.00291056	0.00224178	0.0100197	0.00835592	0.0130259	0	0	0
4501		1	52929854	47612876	26678285	50365788	55628115	17861910	20948598	11364072	13414328	2420481	3139997	1949204	0	0	0	0	0	0	0.0535686	0.0705335	0.0658041	0.0879348	0.0766107	0.072832	0.0362977	0.0233666	0.0287842	0.0858209	0.0819691	0.0264127	0	0	0	0	0	0
		2	413199688	335530768	209941508	362251138	488058433	154414849	177442906	155431444	121113372	13295285	20814173	39777477	0	0	0	0	0	0	0.418186	0.497054	0.517838	0.632463	0.672151	0.629627	0.307456	0.319596	0.259883	0.471399	0.54335	0.539005	0	0	0	0	0	0
		3	521946288	291895569	168799712	160145728	182427392	72971497	378741602	319541952	331503259	12488103	14352914	32071302	36305364	15261734	37042765	0	0	0	0.528245	0.432413	0.416358	0.279602	0.251238	0.297541	0.656247	0.657037	0.711333	0.44278	0.37468	0.434582	1	1	1	0	0	0
5300		1	73566835	62165918	38435396	22298703	40068493	4890079	130278271	105509831	97126084	0	0	0	8022661	1619165	6057505	0	0	0	0.270197	0.25892	0.279233	0.358724	0.241369	0.369931	0.849537	0.867926	0.825339	0	0	0	0.344325	0.304343	0.418653	0	0	0
		2	186322065	171857714	98205863	39465369	124014343	8328811	23073791	16055662	20554193	0	0	0	15277042	3701030	8411538	0	0	0	0.684325	0.715783	0.713464	0.634888	0.74705	0.630069	0.150463	0.132074	0.174661	0	0	0	0.655675	0.695657	0.581347	0	0	0
		3bisecting	12382387	6073783	1005283	397123	1922590	0	0	0	0	0	0	0	0	0	0	0	0	0	0.0454781	0.0252972	0.00730337	0.0063886	0.0115815	0	0	0	0	0	0	0	0	0	0	0	0	0
3401		1	0	0	0	139950866	60445433	51107515	0	0	0	0	0	0	0	0	0	0	0	0	0	0	0	0.38837	0.18344	0.363487	0	0	0	0	0	0	0	0	0	0	0	0
		2	112599220	78831284	49450137	105602280	101047989	49180528	119835938	91640520	83947498	0	0	0	25409476	16956187	38319861	0	0	0	0.304022	0.251077	0.228846	0.293051	0.306661	0.349782	0.119738	0.107974	0.103725	0	0	0	0.107689	0.124568	0.159118	0	0	0
		3	78345696	89385262	65661423	51945864	82584952	17990677	109694205	85117241	81322152	0	0	0	9193114	6752603	9439467	0	0	0	0.211536	0.284692	0.303869	0.144152	0.250629	0.127953	0.109605	0.100288	0.100481	0	0	0	0.0389617	0.0496077	0.0391961	0	0	0
		4	171161517	134933404	92326827	61509982	81744978	21735301	763025906	575865647	544347405	5015196	11143305	18953138	193985472	112411297	190225492	34349904	16390678	42782979	0.462143	0.429762	0.427272	0.170693	0.24808	0.154586	0.762405	0.678506	0.672595	1	1	1	0.822138	0.825824	0.789886	1	1	1
		5	8258553	10822105	8646007	1345567	3687140	589523	8258553	96102626	99707626	0	0	0	7364474	0	2841693	0	0	0	0.0222984	0.0344684	0.0400122	0.00373401	0.0111897	0.0041928	0.00825183	0.113232	0.123199	0	0	0	0.0312117	0	0.0117998	0	0	0
4520		1core+branch	62521485	35967363	19984642	17860633	31226870	7666913	0	0	0	3102946	6295104	10768019	0	0	0	62521485	14294339	23320192	0.16593	0.152887	0.155767	0.115599	0.17988	0.185996	0	0	0	0.16874	0.304191	0.246162	0	0	0	0.409672	0.161556	0.202017
		2branch	174081602	121127887	78307172	122672814	127281840	30480106	7402932	5349611	7906385	13214509	13425511	27530139	19318937	9341320	22747503	90091903	74184710	92116557	0.462006	0.514881	0.610354	0.793976	0.733197	0.739435	0.378685	0.303567	0.437104	0.718615	0.648745	0.629352	0.644447	0.641896	0.602098	0.590328	0.838444	0.797983
		3core+branch	140191759	78158829	30006101	13971023	15089738	3073773	12146134	12272885	10181723	2071409	973965	5445482	10658585	5211388	15032891	0	0	0	0.372064	0.332232	0.233878	0.0904247	0.0869232	0.0745685	0.621315	0.696433	0.562896	0.112645	0.0470638	0.124486	0.355553	0.358104	0.397902	0	0	0
4401		1	268042604	212023421	132846898	68003361	132987275	39567737	58280809	42329007	34619199	0	0	0	0	0	0	0	0	0	0.592112	0.626893	0.68581	0.763439	0.815769	0.892561	0.317647	0.320389	0.266763	0	0	0	0	0	0	0	0	0
		2	184646683	126189791	60861085	21071654	30033502	4762843	125195664	89788712	95155795	0	0	0	19589368	7989154	24235378	0	0	0	0.407888	0.373107	0.31419	0.236561	0.184231	0.107439	0.682353	0.679611	0.733237	0	0	0	1	1	1	0	0	0
4610		1branch	29411922	25280831	12249274	11097423	11740516	4632918	27236994	15466333	17630416	0	0	0	0	0	0	0	0	0	0.0890033	0.11675	0.0881047	0.0920207	0.0876261	0.0697974	0.145152	0.0898436	0.111616	0	0	0	0	0	0	0	0	0
		2branch	123635930	101191195	71011443	70423002	84119072	42873470	53018197	49291516	33038341	0	0	0	0	0	0	0	0	0	0.374134	0.467312	0.51076	0.583953	0.627828	0.645912	0.282546	0.286333	0.209162	0	0	0	0	0	0	0	0	0
		3branch	177410933	90066899	55770161	39076540	38124609	18870302	107389390	107389390	107286905	0	0	0	10626183	3164375	10355015	0	0	0	0.536863	0.415939	0.401135	0.324026	0.284546	0.284291	0.572302	0.623823	0.679222	0	0	0	1	1	1	0	0	0
3400		1	89088581	74638670	28317654	80250634	118926806	26751759	255669463	185812535	200320853	0	0	0	50097622	17928981	51374012	0	0	0	0.614449	0.521765	0.38257	0.589422	0.593924	0.506504	0.534036	0.472289	0.510921	0	0	0	0.725252	0.537255	0.725029	0	0	0
		2bisecting	55900877	68411691	45701912	55900877	81312282	26064707	223080033	207617472	191756752	0	0	0	18978509	15442494	19483835	0	0	0	0.385551	0.478235	0.61743	0.410578	0.406076	0.493496	0.465964	0.527711	0.489079	0	0	0	0.274748	0.462745	0.274971	0	0	0
3510		1branch	31596557	29648706	15947354	34040345	42829054	6364165	36933232	22380867	18720471	0	0	0	14542341	10198267	16632558	0	0	0	0.10377	0.129561	0.118034	0.186836	0.20863	0.0487891	0.0898902	0.0753555	0.0699959	0	0	0	0.0973132	0.119192	0.103636	0	0	0
		2core	26324613	26211694	23769423	16241643	36037853	2861106	23229170	18026686	6802493	0	0	0	1801151	2701640	2011692	0	0	0	0.0864556	0.114542	0.175929	0.089145	0.175548	0.0219339	0.0565365	0.0606951	0.0254346	0	0	0	0.0120528	0.0315752	0.0125346	0	0	0
		3core	73929294	53879961	40337619	30630556	45579781	14344020	269203828	204319159	188604224	4502660	6819478	8591031	76810040	51797756	78841555	28441890	14980757	28972761	0.242799	0.235449	0.298558	0.168121	0.222029	0.109964	0.655204	0.687935	0.705192	0.120046	0.195762	0.132483	0.513991	0.605383	0.491253	0.323277	0.26182	0.294977
		4core	3352581	4758096	4183703	1007291	2940005	444386	44604981	28919478	29052545	0	0	0	3607205	1387911	900891	0	0	0	0.0110106	0.0207923	0.0309656	0.00552869	0.0143214	0.00340676	0.108562	0.0973707	0.108628	0	0	0	0.0241384	0.0162211	0.00561335	0	0	0
		5core	169283999	114340685	50870097	100273701	77900898	106428798	36899138	23357564	24271070	33005057	28016067	56255416	52677715	19476413	62104080	59537968	42236925	69247602	0.555965	0.499655	0.376514	0.550369	0.379472	0.815906	0.0898073	0.078644	0.0907497	0.879954	0.804238	0.867517	0.352504	0.227629	0.386964	0.676723	0.73818	0.705023
6300		1	100299914	57637997	34227792	0	0	0	0	0	0	0	0	0	0	0	0	0	0	0
3501		1	245284534	197053750	128808895	184900740	187109335	77674457	110541464	82698894	80376971	19278031	22488251	26605388	37732279	17751889	37315927	57117796	48324221	57380835	0.60622	0.553294	0.529137	0.642838	0.536202	0.624498	0.342311	0.3234	0.297624	0.464249	0.450855	0.361143	0.28221	0.272457	0.307795	0.533116	0.557936	0.479241
		2	159328708	159092803	114623023	102731321	161843464	46704483	212385842	173018043	189685244	22247125	27390919	47064545	95970359	47402830	83920514	50021661	38288184	62351850	0.39378	0.446706	0.470863	0.357162	0.463798	0.375502	0.657689	0.6766	0.702376	0.535751	0.549145	0.638857	0.71779	0.727543	0.692205	0.466884	0.442064	0.520759
5501		1	6601038	6342571	3291739	3719039	6933896	2396822	0	0	0	0	0	0	0	0	0	0	0	0	0.27238	0.367538	0.371367	1	1	1	0	0	0	0	0	0	0	0	0	0	0	0
		2	6589616	4878678	4137719	0	0	0	0	0	0	0	0	0	0	0	0	0	0	0	0.271909	0.282708	0.466808	0	0	0	0	0	0	0	0	0	0	0	0	0	0	0
		3	9329710	5765296	1434394	0	0	0	59266461	33217704	31400663	0	0	0	0	0	0	0	0	0	0.384974	0.334086	0.161825	0	0	0	0.941335	0.901266	0.918905	0	0	0	0	0	0	0	0	0
		4	1714309	270380	0	0	0	0	3693532	3638992	2771150	0	0	0	0	0	0	0	0	0	0.0707379	0.0156679	0	0	0	0	0.0586647	0.0987335	0.0810946	0	0	0	0	0	0	0	0	0
3611		1core	43073092	31340749	19113109	16827054	17831184	4928824	0	0	0	0	0	0	0	0	0	0	0	0	0.65523	0.692312	0.73076	0.670865	0.676327	0.835832	0	0	0	0	0	0	0	0	0	0	0	0
		2core	22664249	13928942	7041995	8255575	8533555	968081	0	0	0	0	0	0	8490264	2392410	6088280	0	0	0	0.34477	0.307688	0.26924	0.329135	0.323673	0.164168	0	0	0	0	0	0	1	1	1	0	0	0
5602		1	113105	2802975	101440	4960513	4117558	3040225	6549348	2488414	1860169	0	0	0	4155319	1643874	3673972	0	0	0	0.00140908	0.0672596	0.00452925	0.0739802	0.0522375	0.138526	0.145119	0.085073	0.0566852	0	0	0	0.194787	0.166547	0.142794	0	0	0
		2	48753348	30054479	19749080	53904559	64907896	16440224	28339742	17792951	20863947	4789385	3863673	7700131	17177277	8226469	22055249	0	0	0	0.607375	0.721181	0.881787	0.803923	0.823455	0.74909	0.627944	0.608299	0.63579	1	1	1	0.805213	0.833453	0.857206	0	0	0
		3	28014917	7959111	2546138	8186841	9798365	2466474	3507076	3609102	4579349	0	0	0	0	0	0	0	0	0	0.349013	0.190985	0.113684	0.122097	0.124307	0.112384	0.0777088	0.123387	0.139547	0	0	0	0	0	0	0	0	0
		4	1469213	682866	0	0	0	0	6734860	5359885	5512309	0	0	0	0	0	0	0	0	0	0.0183036	0.0163859	0	0	0	0	0.149229	0.183242	0.167977	0	0	0	0	0	0	0	0	0
		5	1918353	174552	0	0	0	0	0	0	0	0	0	0	0	0	0	0	0	0	0.0238991	0.00418851	0	0	0	0	0	0	0	0	0	0	0	0	0	0	0	0
6401		1	4842484	5517028	2630444	0	0	0	0	0	0	0	0	0	0	0	0	0	0	0	0.315496	0.609784	0.567898	0	0	0	0	0	0	0	0	0	0	0	0	0	0	0
		2	10103890	3285066	1869712	0	0	0	0	0	0	0	0	0	0	0	0	0	0	0	0.658286	0.36309	0.40366	0	0	0	0	0	0	0	0	0	0	0	0	0	0	0
		3	402415	245419	131738	0	0	0	0	0	0	0	0	0	0	0	0	0	0	0	0.026218	0.0271256	0.0284415	0	0	0	0	0	0	0	0	0	0	0	0	0	0	0
6613		1core	23738426	9674827	6364053	10909800	14064231	2362850	0	0	0	0	0	0	0	0	0	0	0	0
6713		1core	12460455	3385032	7821989	8940691	5891015	3978890	0	0	0	3874143	603121	1154692	0	0	0	0	0	0
6714		1core	15202883	4683532	14185178	7240859	4635956	3299771	4338094	4446572	4075806	5708933	4446572	6437741	0	0	0	0	0	0
5410		1core	0	0	0	8497299	15701917	2786321	29723666	27583134	32910097	6960837	6244299	12777651	6136679	2406110	5634834	0	0	0	0	0	0	0.555768	0.606325	0.466048	0.461779	0.486644	0.423446	1	1	1	1	1	1	0	0	0
		2core	17234970	13687751	3959848	2771448	3338817	1711179	0	0	0	0	0	0	0	0	0	0	0	0	0.338031	0.500606	0.514276	0.181267	0.128927	0.286217	0	0	0	0	0	0	0	0	0	0	0	0
		3core	21288486	8796290	1634528	2903865	3901377	1332243	0	0	0	0	0	0	0	0	0	0	0	0	0.417533	0.321709	0.212281	0.189928	0.150651	0.222835	0	0	0	0	0	0	0	0	0	0	0	0
		4core	8784856	2703668	592354	40475	78292	93729	0	0	0	0	0	0	0	0	0	0	0	0	0.172298	0.098882	0.0769307	0.00264728	0.00302322	0.0156774	0	0	0	0	0	0	0	0	0	0	0	0
		5core	1842357	652939	439980	883258	2143021	55138	30425661	26440246	39996716	0	0	0	0	0	0	0	0	0	0.0361344	0.0238801	0.0571414	0.0577697	0.0827521	0.00922255	0.472685	0.466481	0.514628	0	0	0	0	0	0	0	0	0
		6core	1835630	1501709	1073133	192945	733438	0	4218372	2656895	4812844	0	0	0	0	0	0	0	0	0	0.0360024	0.0549224	0.139371	0.0126196	0.0283215	0	0.0655355	0.0468751	0.0619257	0	0	0	0	0	0	0	0	0
5601		1	13856107	9567238	6129656	19832021	28843626	6906063	14257389	9315690	9649761	0	0	0	0	0	986727	0	0	0	0.533011	0.657882	0.646226	0.70401	0.779418	0.628626	0.475978	0.423984	0.445105	0	0	0	0	0	0.820271	0	0	0
		2	2706170	1497996	1923945	3381787	2036352	1923945	11350513	8645018	8542917	0	0	0	0	0	0	0	0	0	0.1041	0.103008	0.202834	0.120049	0.0550267	0.175128	0.378933	0.39346	0.394051	0	0	0	0	0	0	0	0	0
		3	7365494	2993134	1225041	3571157	5692644	802604	2943248	2834331	2401902	905155	853968	2273923	0	0	0	0	0	0	0.283333	0.20582	0.129151	0.126771	0.153828	0.0730573	0.0982593	0.128999	0.11079	1	1	1	0	0	0	0	0	0
		4	2068126	484120	206664	1385108	434012	1353346	1402740	1176759	1085143	0	0	0	193288	98304	216201	0	0	0	0.0795559	0.03329	0.0217878	0.0491695	0.011728	0.123189	0.04683	0.0535577	0.0500534	0	0	0	1	1	0.179729	0	0	0

## Sheet: Table S2
Supporting information Table S2. Isomers (highlighted by yellow) that had unique expressions in 231BR when compared to other breast cancer cell lines. Red highlights denote the P-value less than 0.05 when compared to 231BR. Glycan codes and corresponding cartoons as in Table S1.
GLYCANS	ISOMER	re_231BR_01	re_231BR_02	re_231BR_03	231BR	SD	SEM	re_231_01	re_231_02	re_231_03	231	SD	SEM	re_361_01	re_361_02	re_361_03	361	SD	SEM	re_HTB131_01	re_HTB131_02	re_HTB131_03	HTB131	SD	SEM	re_HTB22_01	re_HTB22_02	re_HTB22_03	HTB22	SD	SEM	re_CRL_01	re_CRL_02	re_CRL_03	CRL	SD	SEM	P_vs.231	P_vs.361	P_vs.HTB131	P_vs.HTB22	P_vs.CRL	regulation
4502	1	0.443305	0.547797	0.531648	0.507583	0.0562495	0.0324757	0.890904	0.771518	0.716574	0.792998	0.089128	0.0514581	0.682016	0.763768	0.581797	0.67586	0.0911418	0.0526207	0	0	0	0	0	0	1	1	1	1	0	0	0.187507	0.208979	0.200502	0.198996	0.010815	0.00624407	0.00468699	0.0264559	4.89287e-05	5.51485e-05	0.000367137
	2	0.491378	0.398871	0.423368	0.437872	0.0479285	0.0276715	0.0717748	0.201922	0.266981	0.180226	0.0993952	0.0573859	0.317984	0.236232	0.418203	0.32414	0.0911418	0.0526207	1	1	1	1	0	0	0	0	0	0	0	0	0.612483	0.618303	0.643877	0.624888	0.0167006	0.00964211	0.00777561	0.0641519	1.73352e-05	4.66003e-05	0.00154645
	3	0.0122101	0.00873392	0.0112333	0.0107258	0.00179279	0.00103507	0.0120478	0.00631247	0.00261121	0.00699048	0.00475468	0.00274511	0	0	0	0	0	0	0	0	0	0	0	0	0	0	0	0	0	0	0.038325	0.0345214	0.0287198	0.0338554	0.00483709	0.0027927	0.135954	0.000244787	0.000244787	0.000244787	0.000740964
	4	0.0531076	0.0445977	0.0337505	0.0438186	0.00970206	0.00560148	0.0252736	0.0202479	0.013834	0.0197852	0.00573386	0.00331045	0	0	0	0	0	0	0	0	0	0	0	0	0	0	0	0	0	0	0.161685	0.138196	0.126901	0.142261	0.0177447	0.0102449	0.0104753	0.00072079	0.00072079	0.00072079	0.000541921	up
4512	1	0.516409	0.647393	0.762203	0.642002	0.122986	0.071006	0.811941	0.798713	0.819008	0.809887	0.0103019	0.00594781	0.841054	0.839589	0.838112	0.839585	0.00147116	0.000849374	0.357745	0.336899	0.331973	0.342206	0.0136807	0.00789858	0.510546	0.355063	0.552553	0.472721	0.104037	0.0600655	0.482159	0.378918	0.407224	0.422767	0.0533465	0.0307996	0.0389956	0.0248475	0.00686864	0.0714262	0.0236111
	2	0.472437	0.345796	0.22671	0.348314	0.122883	0.0709464	0.17337	0.192703	0.174189	0.180087	0.0109334	0.00631241	0.148132	0.147655	0.14688	0.147556	0.0006319	0.000364828	0.49313	0.582553	0.53127	0.535651	0.0448723	0.025907	0.489454	0.644937	0.447447	0.527279	0.104037	0.0600655	0.450635	0.551967	0.53192	0.511507	0.0536616	0.0309815	0.0387531	0.0236801	0.0340929	0.063255	0.0513609
	3	0.00486641	0.00237746	0.00463351	0.00395913	0.0013747	0.000793686	0.0128935	0.00702652	0.00499818	0.00830607	0.00410025	0.00236728	0.00963186	0.0116794	0.0140458	0.0117857	0.00220889	0.0012753	0.149125	0.0805472	0.136757	0.122143	0.03655	0.0211022	0	0	0	0	0	0	0.0341098	0.0393186	0.0363495	0.0365926	0.0026129	0.00150856	0.078326	0.00323497	0.00250157	0.00377643	2.19335e-05
	4	0.00628789	0.00443356	0.00645295	0.0057248	0.00112129	0.000647376	0.001796	0.00155672	0.0018047	0.00171914	0.00014073	8.12504e-05	0.00118234	0.00107655	0.000962662	0.00107385	0.000109866	6.34314e-05	0	0	0	0	0	0	0	0	0	0	0	0	0.0330967	0.0297965	0.0245063	0.0291332	0.00433346	0.00250192	0.00178429	0.0010122	0.000451398	0.000451398	0.000411651	up
5603	1	0.363057	0.465987	0.595779	0.474941	0.116619	0.0673301	0.754541	0.804656	0.771052	0.77675	0.0255388	0.0147448	0	0	0	0	0	0	0	0	0	0	0	0	0	0	0	0	0	0	0.537281	0.539961	0.503146	0.526796	0.0205256	0.0118504	0.00594321	0.00106498	0.00106498	0.00106498	0.245192
	2	0.0934621	0.251101	0.24341	0.195991	0.0888758	0.0513125	0	0	0	0	0	0	0	0	0	0	0	0	0	0	0	0	0	0	0	0	0	0	0	0	0.0828416	0.0502102	0.0699762	0.067676	0.0164369	0.00948982	0.00939271	0.00939271	0.00939271	0.00939271	0.0348847	up
	3	0.496182	0.251401	0.149205	0.298929	0.178304	0.102944	0.245459	0.195344	0.228948	0.22325	0.0255388	0.0147448	0	0	0	0	0	0	0	0	0	0	0	0	1	1	1	1	0	0	0.375808	0.405437	0.424418	0.401888	0.0244985	0.0141442	0.253548	0.021975	0.021975	0.00121477	0.188928
	4	0.0472991	0.0315117	0.0116062	0.030139	0.017886	0.0103265	0	0	0	0	0	0	0	0	0	0	0	0	0	0	0	0	0	0	0	0	0	0	0	0	0.00406881	0.00439172	0.00245974	0.00364009	0.00103489	0.000597491	0.0216517	0.0216517	0.0216517	0.0216517	0.0312585	up
5613	1	0.634977	0.431423	0.53145	0.532617	0.101782	0.0587638	0.718712	0.726393	0.759916	0.735007	0.0219111	0.0126504	0.744975	0.83252	0.706371	0.761289	0.0646375	0.0373185	0	0	0	0	0	0	0	0	0	0	0	0	0	0	0	0	0	0	0.0140609	0.0151797	0.000410633	0.000410633	0.000410633
	2	0.140803	0.207038	0.227701	0.191847	0.0453967	0.0262098	0.0562543	0.10785	0.0608141	0.0749726	0.0285634	0.0164911	0.0329488	0.0361749	0.0361076	0.0350771	0.00184348	0.00106433	0	0	0	0	0	0	0	0	0	0	0	0	0.870407	0.364208	0.318251	0.517622	0.306384	0.176891	0.00976616	0.00196945	0.000926735	0.000926735	0.0712906
	3	0.113498	0.209923	0.139984	0.154468	0.0498175	0.0287622	0.225034	0.165758	0.17927	0.19002	0.031066	0.017936	0.222076	0.131305	0.257522	0.203634	0.0650979	0.0375843	0	0	0	0	0	0	0	0	0	0	0	0	0.0299148	0.153832	0.153449	0.112399	0.0714334	0.0412421	0.176719	0.178771	0.00290261	0.00290261	0.224919
	4	0.110722	0.151616	0.100865	0.121068	0.026911	0.0155371	0	0	0	0	0	0	0	0	0	0	0	0	0	0	0	0	0	0	0	0	0	0	0	0	0.0996781	0.48196	0.528299	0.369979	0.235231	0.135811	0.000731554	0.000731554	0.000731554	0.000731554	0.0713636	up
2700	1	0.028553	0.0323557	0.0324238	0.0311108	0.00221542	0.00127907	0.00765103	0.0129938	0.00358964	0.00807815	0.0047166	0.00272313	0	0	0	0	0	0	0	0	0	0	0	0	0	0	0	0	0	0	0.010002	0.00594557	0.00716658	0.00770473	0.00208108	0.00120151	0.000782215	8.47568e-06	8.47568e-06	8.47568e-06	9.13494e-05	up
	2	0.467342	0.428555	0.510763	0.468887	0.041126	0.0237441	0.565813	0.525578	0.609107	0.566833	0.0417739	0.0241182	0.609626	0.595931	0.595993	0.600517	0.00788877	0.00455459	0.634391	0.714022	0.658348	0.668921	0.0408545	0.0235874	0.627884	0.661273	0.662621	0.650593	0.0196781	0.0113612	0.58162	0.572461	0.587781	0.580621	0.00770847	0.00445049	0.0221926	0.0027634	0.00196906	0.00115476	0.00492123
	3	0.504105	0.53909	0.456813	0.500003	0.0412914	0.0238396	0.426536	0.461428	0.387303	0.425089	0.0370836	0.0214103	0.390374	0.404069	0.404007	0.399483	0.00788877	0.00455459	0.365609	0.285978	0.341652	0.331079	0.0408545	0.0235874	0.372116	0.338727	0.337379	0.349407	0.0196781	0.0113612	0.408378	0.421593	0.405053	0.411675	0.00874912	0.00505131	0.039779	0.0071791	0.0036487	0.00233706	0.0111329	up
2300	1	0.108036	0.138846	0.12668	0.124521	0.0155181	0.00895935	0.0713359	0.0611574	0.0695012	0.0673315	0.00542505	0.00313216	0.272145	0.294927	0.176346	0.247806	0.0629258	0.0363302	0.161137	0.145903	0.158772	0.155271	0.00819853	0.00473342	0.0858432	0.0735486	0.124216	0.094536	0.0264288	0.0152587	0.187629	0.166764	0.176346	0.176913	0.0104443	0.00603002	0.00191122	0.0150405	0.0193017	0.0827019	0.00416573
	2	0.643942	0.610353	0.64189	0.632062	0.0188282	0.0108704	0.864641	0.729966	0.90427	0.832959	0.0913693	0.0527521	0.727855	0.705073	0.823654	0.752194	0.0629258	0.0363302	0.797515	0.820709	0.811801	0.810008	0.0117006	0.00675536	0.911861	0.918851	0.871637	0.900783	0.0254823	0.0147122	0.812371	0.833236	0.823654	0.823087	0.0104443	0.00603002	0.0101488	0.0169628	7.75835e-05	6.24749e-05	5.23129e-05
	3	0.248021	0.250801	0.23143	0.243418	0.0104737	0.00604699	0.064023	0.208877	0.0262286	0.0997095	0.0964119	0.0556635	0	0	0	0	0	0	0.0413479	0.0333882	0.0294274	0.0347211	0.00607101	0.0035051	0.00229604	0.00760009	0.00414695	0.00468103	0.00269206	0.00155426	0	0	0	0	0	0	0.0311001	1.13785e-06	3.74613e-06	1.39699e-06	1.13785e-06	up
2400	1	0.495213	0.506522	0.551803	0.517846	0.0299465	0.0172896	0.381356	0.397664	0.369992	0.383004	0.0139096	0.0080307	0.382571	0.444734	0.41097	0.412758	0.03112	0.0179672	0.267748	0.275434	0.316453	0.286545	0.026185	0.0151179	0.364444	0.396616	0.429587	0.396882	0.0325723	0.0188056	0.549548	0.545163	0.534645	0.543118	0.00765921	0.00442205	0.0010541	0.00676867	0.000273405	0.00453467	0.114841	up
	2	0.504787	0.493478	0.448197	0.482154	0.0299465	0.0172896	0.618644	0.602336	0.630008	0.616996	0.0139096	0.0080307	0.617429	0.555266	0.58903	0.587242	0.03112	0.0179672	0.732252	0.724566	0.683547	0.713455	0.026185	0.0151179	0.635556	0.603384	0.570413	0.603118	0.0325723	0.0188056	0.450452	0.454837	0.465355	0.456882	0.00765921	0.00442205	0.0010541	0.00676867	0.000273405	0.00453467	0.114841
4300	1	0.663511	0.540025	0.44866	0.550732	0.107825	0.0622528	0.982236	0.907786	0.963162	0.951061	0.0386716	0.0223271	0	0	0	0	0	0	0.945756	1	1	0.981919	0.0313176	0.0180812	0	0	0	0	0	0	0.485194	0.473126	0.487898	0.482073	0.00786518	0.00454096	0.00187946	0.000450689	0.00132641	0.000450689	0.166543
	2	0.21776	0.355602	0.372293	0.315219	0.0848133	0.048967	0	0	0.00912244	0.00304081	0.00526684	0.00304081	0	0	0	0	0	0	0	0	0	0	0	0	0	0	0	0	0	0	0	0	0	0	0	0	0.00156366	0.00149783	0.00149783	0.00149783	0.00149783	up
	3bisecting	0.118729	0.104372	0.179046	0.134049	0.0396242	0.0228771	0.0177644	0.0922137	0.0277154	0.0458978	0.0404181	0.0233354	0	0	0	0	0	0	0.0542436	0	0	0.0180812	0.0313176	0.0180812	0	0	0	0	0	0	0.514806	0.526874	0.512102	0.517927	0.00786518	0.00454096	0.0271169	0.00211697	0.00822119	0.00211697	3.98934e-05	up
4400	1	0.339277	0.47669	0.416993	0.410986	0.0689031	0.0397812	0.536455	0.564084	0.581428	0.560656	0.022682	0.0130954	0	0	0	0	0	0	0	0	0	0	0	0	0	0	0	0	0	0	0.243053	0.300031	0.296021	0.279702	0.0318019	0.0183609	0.0116496	0.00024767	0.00024767	0.00024767	0.020042
	2	0.660723	0.52331	0.583007	0.589014	0.0689031	0.0397812	0.463545	0.435916	0.418572	0.439344	0.022682	0.0130954	0	0	0	0	0	0	0	0	0	0	0	0	0	0	0	0	0	0	0.756947	0.699969	0.703979	0.720298	0.0318019	0.0183609	0.0116496	6.05676e-05	6.05676e-05	6.05676e-05	0.020042	up
4611	1core	0.292549	0.439193	0.425577	0.385773	0.0810207	0.0467773	0.517619	0.596865	0.607967	0.57415	0.0492711	0.0284467	0	0	0	0	0	0	0	0	0	0	0	0	0	0	0	0	0	0	0.0914145	0.0839359	0.0835807	0.0863104	0.00442387	0.00255412	0.0131371	0.000589549	0.000589549	0.000589549	0.00153726
	2core	0.643483	0.485347	0.510457	0.546429	0.0849837	0.0490654	0.436267	0.353998	0.380614	0.390293	0.0419799	0.0242371	0	0	0	0	0	0	0	0	0	0	0	0	0	0	0	0	0	0	0.630448	0.732643	0.712339	0.69181	0.0541021	0.0312359	0.0231256	0.000184968	0.000184968	0.000184968	0.0334015	up
	3core	0.0639676	0.0754599	0.063966	0.0677979	0.00663553	0.00383103	0.0461134	0.0491364	0.0114194	0.0355564	0.0209579	0.0121	0	0	0	0	0	0	0	0	0	0	0	0	0	0	0	0	0	0	0.278137	0.183421	0.20408	0.221879	0.0498038	0.0287542	0.0319805	2.99453e-05	2.99453e-05	2.99453e-05	0.00301976	up
3411	1branch	0.275859	0.226468	0.195779	0.232702	0.0404023	0.0233263	0.235832	0.256287	0.288313	0.260144	0.0264522	0.0152722	0.239314	0.196353	0.229947	0.221871	0.0225905	0.0130426	0.0774581	0.0832119	0.0851971	0.0819557	0.00401952	0.00232067	0.311295	0.233263	0.273724	0.27276	0.0390249	0.022531	0.070771	0.0807426	0.0797103	0.0770746	0.00548341	0.00316585	0.190357	0.353009	0.00150352	0.142176	0.00135678
	2branch	0.410595	0.371794	0.370952	0.384447	0.0226486	0.0130762	0.399796	0.345783	0.431112	0.39223	0.0431651	0.0249214	0.35021	0.426447	0.385671	0.387443	0.0381492	0.0220254	0.0640749	0.0482237	0.0553826	0.0558938	0.00793794	0.00458297	0.263677	0.31583	0.272077	0.283861	0.0280024	0.0161672	0.0737608	0.0654558	0.0746521	0.0712896	0.0050718	0.0029282	0.397909	0.456265	9.37827e-06	0.004208	9.93596e-06
	3core	0.288611	0.37844	0.414333	0.360461	0.0647603	0.0373894	0.350949	0.385056	0.279574	0.338526	0.053827	0.0310771	0.410476	0.37429	0.38214	0.388969	0.0190349	0.0109898	0.848447	0.860209	0.846394	0.851683	0.00745397	0.00430355	0.425028	0.450907	0.4542	0.443378	0.0159768	0.00922421	0.477028	0.519616	0.510151	0.502265	0.0223626	0.012911	0.337622	0.252511	9.94554e-05	0.0488206	0.0115333
	4core	0.0249348	0.0232983	0.0189356	0.0223896	0.00310116	0.00179045	0.0134228	0.0128745	0.00100065	0.00909932	0.00701902	0.00405243	0	0.00291056	0.00224178	0.00171745	0.00152448	0.000880157	0.0100197	0.00835592	0.0130259	0.0104672	0.00236694	0.00136656	0	0	0	0	0	0	0.37844	0.334186	0.335486	0.349371	0.0251834	0.0145397	0.0199744	0.00024487	0.00305752	0.000117625	1.1927e-05	up
5501	1	0.27238	0.367538	0.371367	0.337095	0.0560774	0.0323763	1	1	1	1	0	0	0	0	0	0	0	0	0	0	0	0	0	0	0	0	0	0	0	0	0	0	0	0	0	0	1.68016e-05	0.000240312	0.000240312	0.000240312	0.000240312
	2	0.271909	0.282708	0.466808	0.340475	0.109541	0.0632435	0	0	0	0	0	0	0	0	0	0	0	0	0	0	0	0	0	0	0	0	0	0	0	0	0	0	0	0	0	0	0.00287747	0.00287747	0.00287747	0.00287747	0.00287747	up
	3	0.384974	0.334086	0.161825	0.293628	0.116946	0.067519	0	0	0	0	0	0	0	0	0	0	0	0	0	0	0	0	0	0	0	0	0	0	0	0	0.941335	0.901266	0.918905	0.920502	0.0200821	0.0115944	0.00608415	0.00608415	0.00608415	0.00608415	0.000395854	up
6401	1	0.315496	0.609784	0.567898	0.497726	0.159199	0.0919137	0	0	0	0	0	0	0	0	0	0	0	0	0	0	0	0	0	0	0	0	0	0	0	0	0	0	0	0	0	0	0.00281758	0.00281758	0.00281758	0.00281758	0.00281758	up
	2	0.658286	0.36309	0.40366	0.475012	0.160011	0.0923821	0	0	0	0	0	0	0	0	0	0	0	0	0	0	0	0	0	0	0	0	0	0	0	0	0	0	0	0	0	0	0.00339137	0.00339137	0.00339137	0.00339137	0.00339137	up
	3	0.026218	0.0271256	0.0284415	0.0272617	0.00111797	0.000645458	0	0	0	0	0	0	0	0	0	0	0	0	0	0	0	0	0	0	0	0	0	0	0	0	0	0	0	0	0	0	9.39207e-07	9.39207e-07	9.39207e-07	9.39207e-07	9.39207e-07	up
5410	1core	0	0	0	0	0	0	0.555768	0.606325	0.466048	0.542714	0.0710437	0.0410171	1	1	1	1	0	0	1	1	1	1	0	0	0	0	0	0	0	0	0.461779	0.486644	0.423446	0.45729	0.0318373	0.0183813	9.42622e-05	#DIV/0!	#DIV/0!	#DIV/0!	7.74808e-06
	2core	0.338031	0.500606	0.514276	0.450971	0.0980474	0.0566077	0.181267	0.128927	0.286217	0.198804	0.0800977	0.0462444	0	0	0	0	0	0	0	0	0	0	0	0	0	0	0	0	0	0	0	0	0	0	0	0	0.0130293	0.000672561	0.000672561	0.000672561	0.000672561	up
	3core	0.417533	0.321709	0.212281	0.317174	0.102702	0.0592947	0.189928	0.150651	0.222835	0.187805	0.036139	0.0208649	0	0	0	0	0	0	0	0	0	0	0	0	0	0	0	0	0	0	0	0	0	0	0	0	0.0543427	0.00294457	0.00294457	0.00294457	0.00294457
	4core	0.172298	0.098882	0.0769307	0.116037	0.0499447	0.0288356	0.00264728	0.00302322	0.0156774	0.00711596	0.00741679	0.00428209	0	0	0	0	0	0	0	0	0	0	0	0	0	0	0	0	0	0	0	0	0	0	0	0	0.0100926	0.00790535	0.00790535	0.00790535	0.00790535	up
	5core	0.0361344	0.0238801	0.0571414	0.039052	0.0168215	0.0097119	0.0577697	0.0827521	0.00922255	0.0499148	0.0373888	0.0215865	0	0	0	0	0	0	0	0	0	0	0	0	0	0	0	0	0	0	0.472685	0.466481	0.514628	0.484598	0.0261912	0.0151215	0.335062	0.00792535	0.00792535	0.00792535	7.85613e-06
	6core	0.0360024	0.0549224	0.139371	0.0767652	0.0550371	0.0317757	0.0126196	0.0283215	0	0.013647	0.0141887	0.00819184	0	0	0	0	0	0	0	0	0	0	0	0	0	0	0	0	0	0	0.0655355	0.0468751	0.0619257	0.0581121	0.00989749	0.00571432	0.0633817	0.0365453	0.0365453	0.0365453	0.297197

## Sheet: Table S3
Supporting information Table S3. Isomers (highlighted by yellow) that had unique expressions in 231BR/231 when compared to other breast cancer cell lines. Red highlights denotes the P-value less than 0.05 when compared to 231BR. Glycan codes and corresponding cartoons as in Table S1.
GLYCANS	ISOMER	re_231BR_01	re_231BR_02	re_231BR_03	re_231_01	re_231_02	re_231_03	re_CRL_01	re_CRL_02	re_CRL_03	re_361_01	re_361_02	re_361_03	re_HTB131_01	re_HTB131_02	re_HTB131_03	re_HTB22_01	re_HTB22_02	re_HTB22_03	P_vs.231	P_vs.361	P_vs.HTB131	P_vs.HTB22	P_vs.CRL	regulation
4502	1	0.443305	0.547797	0.531648	0.890904	0.771518	0.716574	0.187507	0.208979	0.200502	0.682016	0.763768	0.581797	0	0	0	1	1	1	0.00468699	0.0264559	4.89287e-05	5.51485e-05	0.000367137
	2	0.491378	0.398871	0.423368	0.0717748	0.201922	0.266981	0.612483	0.618303	0.643877	0.317984	0.236232	0.418203	1	1	1	0	0	0	0.00777561	0.0641519	1.73352e-05	4.66003e-05	0.00154645
	3	0.0122101	0.00873392	0.0112333	0.0120478	0.00631247	0.00261121	0.038325	0.0345214	0.0287198	0	0	0	0	0	0	0	0	0	0.135954	0.000244787	0.000244787	0.000244787	0.000740964	up
	4	0.0531076	0.0445977	0.0337505	0.0252736	0.0202479	0.013834	0.161685	0.138196	0.126901	0	0	0	0	0	0	0	0	0	0.0104753	0.00072079	0.00072079	0.00072079	0.000541921
3300	1	0.286227	0.132089	0.125395	0.534899	0.158449	0	0.484225	0.489538	0.547913	0	0	0	0.755354	0.881263	0.845731	0	0	0	0.390093	0.0130257	0.000279463	0.0130257	0.00221853
	2	0.619526	0.773868	0.793515	0.235162	0.7061	0.786711	0.0658726	0.0250745	0.0284096	0	0	0	0.244646	0.118737	0.154269	0	0	0	0.222311	9.37344e-05	0.000560055	9.37344e-05	0.000130082	up
	3	0.0942476	0.094043	0.0810896	0.229939	0.135451	0.213289	0.449903	0.485388	0.423677	0	0	0	0	0	0	0	0	0	0.0124306	1.6302e-05	1.6302e-05	1.6302e-05	1.94409e-05
4511	1core	0.108721	0.105962	0.15195	0.120925	0.119035	0.116437	0.104915	0.0719079	0.0652474	0	0	0	0	0	0	0	0	0	0.415324	0.000600563	0.000600563	0.000600563	0.048864	up
	2core	0.417818	0.545099	0.61987	0.658513	0.622778	0.679304	0.401933	0.328992	0.342906	0.732534	0.745154	0.71252	0.0978774	0.0888999	0.127867	0.51562	0.540122	0.429773	0.0544593	0.013775	0.00107968	0.328745	0.0273393
	3core	0.473462	0.348939	0.22818	0.220561	0.258187	0.204259	0.493151	0.5991	0.591847	0.267466	0.254846	0.28748	0.902123	0.9111	0.872133	0.48438	0.459878	0.570227	0.0833456	0.162057	0.000807634	0.0597745	0.0274466
3511	1core	0.790875	0.684997	0.695361	0.574166	0.666913	0.69772	0.409693	0.288545	0.231671	0.366843	0.345594	0.422496	0	0	0	0	0	0	0.0985994	0.000531225	1.38986e-05	1.38986e-05	0.00134017	up
	2core	0.209125	0.315003	0.304639	0.425834	0.333087	0.30228	0.590307	0.711455	0.768329	0.633157	0.654406	0.577504	1	1	1	1	1	1	0.0985994	0.000531225	1.38986e-05	1.38986e-05	0.00134017
5300	1	0.270197	0.25892	0.279233	0.358724	0.241369	0.369931	0.849537	0.867926	0.825339	0	0	0	0.344325	0.304343	0.418653	0	0	0	0.132098	6.76218e-07	0.0320335	6.76218e-07	9.31469e-07
	2	0.684325	0.715783	0.713464	0.634888	0.74705	0.630069	0.150463	0.132074	0.174661	0	0	0	0.655675	0.695657	0.581347	0	0	0	0.220032	1.27631e-07	0.0799547	1.27631e-07	2.0798e-06
	3bisecting	0.0454781	0.0252972	0.00730337	0.0063886	0.0115815	0	0	0	0	0	0	0	0	0	0	0	0	0	0.0785371	0.038814	0.038814	0.038814	0.038814	up
3401	1	0	0	0	0.38837	0.18344	0.363487	0	0	0	0	0	0	0	0	0	0	0	0	0.00423428	#DIV/0!	#DIV/0!	#DIV/0!	#DIV/0!
	2	0.304022	0.251077	0.228846	0.293051	0.306661	0.349782	0.119738	0.107974	0.103725	0	0	0	0.107689	0.124568	0.159118	0	0	0	0.0605081	0.000151585	0.0041524	0.000151585	0.00135461	up
	3	0.211536	0.284692	0.303869	0.144152	0.250629	0.127953	0.109605	0.100288	0.100481	0	0	0	0.0389617	0.0496077	0.0391961	0	0	0	0.0622104	0.00034535	0.00069262	0.00034535	0.00224142	up
	4	0.462143	0.429762	0.427272	0.170693	0.24808	0.154586	0.762405	0.678506	0.672595	1	1	1	0.822138	0.825824	0.789886	1	1	1	0.000653095	4.83186e-07	1.008e-05	4.83186e-07	0.000522106
	5	0.0222984	0.0344684	0.0400122	0.00373401	0.0111897	0.0041928	0.00825183	0.113232	0.123199	0	0	0	0.0312117	0	0.0117998	0	0	0	0.00543753	0.00175555	0.0814472	0.00175555	0.127515
4610	1branch	0.0890033	0.11675	0.0881047	0.0920207	0.0876261	0.0697974	0.145152	0.0898436	0.111616	0	0	0	0	0	0	0	0	0	0.135474	0.000239742	0.000239742	0.000239742	0.19936	up
	2branch	0.374134	0.467312	0.51076	0.583953	0.627828	0.645912	0.282546	0.286333	0.209162	0	0	0	0	0	0	0	0	0	0.00952412	0.000181945	0.000181945	0.000181945	0.00786502
	3branch	0.536863	0.415939	0.401135	0.324026	0.284546	0.284291	0.572302	0.623823	0.679222	0	0	0	1	1	1	0	0	0	0.0134191	0.000232695	0.000108555	0.000232695	0.0151937
3510	1branch	0.10377	0.129561	0.118034	0.186836	0.20863	0.0487891	0.0898902	0.0753555	0.0699959	0	0	0	0.0973132	0.119192	0.103636	0	0	0	0.286823	4.80529e-05	0.176089	4.80529e-05	0.00768368
	2core	0.0864556	0.114542	0.175929	0.089145	0.175548	0.0219339	0.0565365	0.0606951	0.0254346	0	0	0	0.0120528	0.0315752	0.0125346	0	0	0	0.295891	0.00446609	0.0085336	0.00446609	0.0263819	up
	3core	0.242799	0.235449	0.298558	0.168121	0.222029	0.109964	0.655204	0.687935	0.705192	0.120046	0.195762	0.132483	0.513991	0.605383	0.491253	0.323277	0.26182	0.294977	0.0361033	0.0118002	0.00114451	0.133336	3.40277e-05
	4core	0.0110106	0.0207923	0.0309656	0.00552869	0.0143214	0.00340676	0.108562	0.0973707	0.108628	0	0	0	0.0241384	0.0162211	0.00561335	0	0	0	0.0595603	0.0110615	0.258148	0.0110615	0.0001288
	5core	0.555965	0.499655	0.376514	0.550369	0.379472	0.815906	0.0898073	0.078644	0.0907497	0.879954	0.804238	0.867517	0.352504	0.227629	0.386964	0.676723	0.73818	0.705023	0.244842	0.00149479	0.048446	0.00741137	0.000908229
3611	1core	0.65523	0.692312	0.73076	0.670865	0.676327	0.835832	0	0	0	0	0	0	0	0	0	0	0	0	0.290893	2.92495e-06	2.92495e-06	2.92495e-06	2.92495e-06	up
	2core	0.34477	0.307688	0.26924	0.329135	0.323673	0.164168	0	0	0	0	0	0	1	1	1	0	0	0	0.290893	7.36237e-05	2.92495e-06	7.36237e-05	7.36237e-05
5602	1	0.00140908	0.0672596	0.00452925	0.0739802	0.0522375	0.138526	0.145119	0.085073	0.0566852	0	0	0	0.194787	0.166547	0.142794	0	0	0	0.0652563	0.159413	0.00269092	0.159413	0.0512508
	2	0.607375	0.721181	0.881787	0.803923	0.823455	0.74909	0.627944	0.608299	0.63579	1	1	1	0.805213	0.833453	0.857206	0	0	0	0.269783	0.0148715	0.152592	0.000378737	0.115769
	3	0.349013	0.190985	0.113684	0.122097	0.124307	0.112384	0.0777088	0.123387	0.139547	0	0	0	0	0	0	0	0	0	0.114664	0.0173179	0.0173179	0.0173179	0.109603	up
	4	0.0183036	0.0163859	0	0	0	0	0.149229	0.183242	0.167977	0	0	0	0	0	0	0	0	0	0.0586654	0.0586654	0.0586654	0.0586654	8.48221e-05
	5	0.0238991	0.00418851	0	0	0	0	0	0	0	0	0	0	0	0	0	0	0	0	0.136359	0.136359	0.136359	0.136359	0.136359
5410	1core	0	0	0	0.555768	0.606325	0.466048	0.461779	0.486644	0.423446	1	1	1	1	1	1	0	0	0	9.42622e-05	#DIV/0!	#DIV/0!	#DIV/0!	7.74808e-06
	2core	0.338031	0.500606	0.514276	0.181267	0.128927	0.286217	0	0	0	0	0	0	0	0	0	0	0	0	0.0130293	0.000672561	0.000672561	0.000672561	0.000672561
	3core	0.417533	0.321709	0.212281	0.189928	0.150651	0.222835	0	0	0	0	0	0	0	0	0	0	0	0	0.0543427	0.00294457	0.00294457	0.00294457	0.00294457	up
	4core	0.172298	0.098882	0.0769307	0.00264728	0.00302322	0.0156774	0	0	0	0	0	0	0	0	0	0	0	0	0.0100926	0.00790535	0.00790535	0.00790535	0.00790535
	5core	0.0361344	0.0238801	0.0571414	0.0577697	0.0827521	0.00922255	0.472685	0.466481	0.514628	0	0	0	0	0	0	0	0	0	0.335062	0.00792535	0.00792535	0.00792535	7.85613e-06	up
	6core	0.0360024	0.0549224	0.139371	0.0126196	0.0283215	0	0.0655355	0.0468751	0.0619257	0	0	0	0	0	0	0	0	0	0.0633817	0.0365453	0.0365453	0.0365453	0.297197	up
5601	1	0.533011	0.657882	0.646226	0.70401	0.779418	0.628626	0.475978	0.423984	0.445105	0	0	0	0	0	0.820271	0	0	0	0.0976489	5.21748e-05	0.143601	5.21748e-05	0.00914215
	2	0.1041	0.103008	0.202834	0.120049	0.0550267	0.175128	0.378933	0.39346	0.394051	0	0	0	0	0	0	0	0	0	0.349646	0.0072531	0.0072531	0.0072531	0.000830317	up
	3	0.283333	0.20582	0.129151	0.126771	0.153828	0.0730573	0.0982593	0.128999	0.11079	1	1	1	0	0	0	0	0	0	0.0776117	2.90262e-05	0.0049014	0.0049014	0.0543534
	4	0.0795559	0.03329	0.0217878	0.0491695	0.011728	0.123189	0.04683	0.0535577	0.0500534	0	0	0	1	1	0.179729	0	0	0	0.340309	0.03192	0.033814	0.03192	0.390741
